# Supplementary material for: Evaluating a large-scale online behaviour change intervention aimed at wildlife product consumers in Singapore
Source: PLoS One. 2021 Mar 24;16(3):e0248144. doi: 10.1371/journal.pone.0248144 (PMC7990170; doi:10.1371/journal.pone.0248144)
Supplement: S2 File — (XLSX) [file pone.0248144.s002.xlsx]

## Sheet: Consumer Survey
S2 File: Full Surveys
Consumer Survey
The survey structure covers:
		1. Their preferences for heatiness and fever treatments.
		a. What heatiness treatments they use most often to treat themselves.
		i. If these heatiness preferences have changed in the last four months.
		b. What heatiness treatments they use most often to treat others.
		c. What fever treatments they use most often to treat themselves.
		i. If these fever preferences have changed in the last four months.
		d. What fever treatments they use most often to treat others.
		2. Their perception of how common in the wild, are certain animals that are used in TCM.
		3. Their knowledge of the intervention and any changes it has caused.
		a. If they recall recent media attention about ling yang (saiga horn).
		b. What they think this media attention is about.
		c. Where they heard about this media attention.
		d. If this media attention affected their choice of using saiga horn.
		e. If this media attention affected others’ choice of using saiga horn.
		4. Their demographics.
The consumer survey used a decision tree style format in which respondants were asked certain subsequent questions depending on the answers they provided. For brevity, each specific question and answer set is only shown here once. In other words, only the first time a question and answer set is asked, the question and answer set is written out in full.
Question Number				Shows the Question Number that a respondant would proceed to, depending on the answer selected; if no number is listed here then the immediately proceeding question would follow.
		Consent:
1		Has the researcher told you about the survey and the terms of your participation?
		Yes
		No
2		Do you consent to participate?
		Yes
		No
		The following questions address treatments for heatiness. Heatiness is defined as having a body temperature below 38°C but having symptoms such as: sore throat, nasal congestion, headache, fatigue, and cough.
3		If you are fealing heaty, which of the following treatment(s) do you use most often? [Select all that apply]
		Western product (e.g. isotonic drinks)		9
		Herbal traditional product (e.g. chrysanthemum tea)		9
		Animal traditional medicine product (e.g. saiga antelope [ling yang])		4
		Other		9
		When treating heatiness with traditional animal products:
4		Which type of animal products do you use most often? [Select all that apply]
		Goat (shan yang)
		Saiga antelope (ling yang)
		Sheep (mian yang)
		Buffalo (shui niu)
		Other
5		What form of treatment do you use most often?
		Cooling water
		Pills/capsules
		Fever patch
		Shavings of animal horn
		Whole animal horn
6		Where do you normally shop for this treatment? [Select all that apply]
		Pharmacy
		Traditional medicine chain store
		Traditional medicine family-owned store
		Family-owned provision shop
		Supermarket
		Online
		Other
7		Why do you prefer using this treatment? [Select all that apply]
		It works
		Someone recommended it to me		8
		It’s affordable
		It’s convenient
		I don’t know
		Other
8		Who recommended this treatment to you? [Select all that apply]
		Western doctor
		Traditional medicine practitioner
		Pharmacist
		Traditional medicine shopkeeper
		Family
		Friends
		Other
9		Has your preference for HEATINESS treatment(s) changed in the last four months?
		Yes		10
		No
10		How so?
11		Do you purchase heatiness medication for others? If so who? [Select all that apply]
		A child (0 - 12 years old)		12
		A teenager (13 - 20 years old)		(not shown)
		An adult (21 years and above)		(not shown)
		I do not purchase medication for anyone else
12		When buying heatiness medication for a CHILD, which of the following treatment(s) do you use most often? [Select all that apply]		Depending on #11 answer, respondant will be asked about child, teen, and/or other adult purchases, using the same 'self use' decision tree
		Western product (e.g. isotonic drinks)		(not shown)
		Herbal traditional product (e.g. chrysanthemum tea)		(not shown)
		Animal traditional medicine product (e.g. saiga antelope [ling yang])		(not shown)
		Other		(not shown)
		The following questions address treatments for fever. Fever is defined as having a body temperature of 38°C and above.		The entire decision tree asked of heatiness medication preferences is repeated for fever medication preferences
13		If you get a fever, which of the following treatment(s) do you use most often? [Select all that apply]
		Western medicine product (e.g. Panadol)		(not shown)
		Herbal traditional product (e.g. chrysanthemum tea)		(not shown)
		Animal traditional medicine product (e.g. saiga antelope [ling yang])		(not shown)
		Other		(not shown)
14		Which of these animals used in traditional medicine products are common in the wild? [Select all that apply]
		Sea cucumber (hai shen)
		Goat (shan yang)
		Turtle (hai gui)
		Saiga antelope (ling yang)
		Sea horse (hai ma)
		Rhino (xi niu)
		I don't know
		There has been some media attention in the last four months about a TCM treatment for heatiness and fever called ling yang.
15		Did you hear about this?
		Yes		16
		No		22
		Maybe		16
16		How did you hear about it? [Select all that apply]
		Social media
		News outlet/Newspaper
		Friends
		Family
		Colleague
		TCM shopkeeper
		TCM practitioner
		Other
17		What was the media attention about?
18		Did this affect your choice whether or not to use ling yang?
		I used ling yang and I still do		19
		I used ling yang but now I don't		19
		I did not use ling yang and I still don't		20
		I did not use ling yang but now I do		19
19		Why?
20		Do you think your friends and family were affected in the same way as you?
		Most were affected the same way as me		21
		Some were affected the same way as me		21
		None were affected the same way as me		21
		I don't know		22
21		How so?
		Demographics
22		What is your gender?
		Male
		Female
		Prefer not to say
23		What is your age?
		18 - 35 years
		36 - 59 years
		≥ 60 years
		Prefer not to say
24		What media/news topics are most interesting to you? [Select all that apply]
		Current events (e.g. politics, finance, market)
		Domestic animals (e.g. pets)
		Healthcare (e.g. western medicine)
		Lifestyle (e.g. entertainment, fashion, travel, home, food)
		Nature (e.g. wildlife, outdoors)
		Sports (e.g. professional teams, exercise, recreation)
		Technology (e.g. computers, electronics)
		Traditional medicine (e.g. Chinese and herbal medicine)
		Other
25		What is the dialect group of your family?
		Hokkiens		27
		Teochews		27
		Cantonese		27
		Hakkas		27
		Hainanese		27
		Other		26
		Prefer not to say		27
26		Please specify the dialect group of your family.
27		What religion do you identify yourself most with?
		Buddhist		29
		Muslim		29
		Taoist		29
		Catholic		29
		Hindu		29
		Christian (other)		29
		Other		28
		I do not identify with a religion		29
		Prefer not to say		29
28		Please specify the religion you most identify with.
29		What generation of Singaporean are you?
		First
		Second
		Third
		More than third
		Prefer not to say
30		What is your highest level of education?
		Pre-primary or primary school
		Secondary school
		ITE
		Polytechnic
		Junior college
		Accredited diploma
		University
		Masters or PhD
		Prefer not to say
31		What is the approximate total MONTHLY income for your household?
		Less than $5000
		$5001 to $15,000
		$15,001 to $25,000
		$25,001 to $35,000
		$35,001 and higher
		Prefer not to say

## Sheet: Shopkeeper Survey
File S2: Full Surveys
Shopkeeper Survey
The survey structure covers:
		1. Their customer’s preferences for heatiness and fever treatments.
		a. What heatiness or fever treatments their customers purchase most often
		i. If these preferences have changed in the last four months.
		b. What heatiness or fever treatments their middle-aged female customers purchase most often
		i. If these preferences have changed in the last four months.
		2. Their perception of how common in the wild, are certain animals that are used in TCM.
		3. Their knowledge of the intervention and any changes it has caused.
		a. If they recall recent media attention about ling yang (saiga horn).
		b. What they think this media attention is about.
		c. Where they heard about this media attention.
		d. If this media attention affected sales of ling yang and alternative products.
		e. If this media attention affected which products they recommend to customers.
		4. Their demographics.
The shopkeeper survey used a decision tree style format in which respondants were asked certain subsequent questions depending on the answers they provided. For brevity, each specific question and answer set is only shown here once. In other words, only the first time a question and answer set is asked, the question and answer set is written out in full.
Question Number				Shows the Question Number that a respondant would proceed to, depending on the answer selected; if no number is listed here then the immediately proceeding question would follow.
		Consent:
1		Has the researcher told you about the survey and the terms of your participation?
		Yes
		No
2		Do you consent to participate?
		Yes
		No
3		When treating HEATINESS or FEVER what products do your customers purchase most often?
		Herbal traditional product (e.g. chrysanthemum tea)		4
		Animal traditional medicine product (e.g. saiga antelope [ling yang])		5
		Western product (e.g. Panadol)		8
		Other		8
4		Which HERBAL products do they purchase most often? [Select all that apply]
		Honeysuckle (jin yin hua)
		Chrysanthemum (ju hua)
		Barley (yi mi)
		Ginseng (ren shen)
		Other
5		Which ANIMAL products do they purchase most often? [Select all that apply]
		Goat (shan yang)
		Saiga antelope (ling yang)
		Sheep (mian yang)
		Buffalo (shui niu)
		Other
6		Have your customers' sale purchases for these HEATINESS or FEVER treatments changed in the last four months?
		Yes		7
		No		8
7		How so?
8		What do women (aged about 35 - 59 years old), specifically, purchase most often to treat HEATINESS or FEVER?
		Herbal traditional product (e.g. chrysanthemum tea)		9
		Animal traditional medicine product (e.g. saiga antelope [ling yang])		10
		Western product (e.g. Panadol)		13
		Other		13
9		Which HERBAL products do these women purchase most often? [Select all that apply]
		Honeysuckle (jin yin hua)
		Chrysanthemum (ju hua)
		Barley (yi mi)
		Ginseng (ren shen)
		Other
10		Which ANIMAL products do these women purchase most often? [Select all that apply]
		Goat (shan yang)
		Saiga antelope (ling yang)
		Sheep (mian yang)
		Buffalo (shui niu)
		Other
11		Have these women's sale purchases for their HEATINESS or FEVER treatments changed in the last four months?
		Yes		12
		No		13
12		How so?
13		Which of these animals used in traditional medicine products are common in the wild? [Select all that apply]
		Sea cucumber (hai shen)
		Goat (shan yang)
		Turtle (hai gui)
		Saiga antelope (ling yang)
		Sea horse (hai ma)
		Rhino (xi niu)
		I don't know
14		Any remarks?
		There are many factors that can influence or change a customer's choice of health products, such as their family's recommendations, media they see, price, and convenience. To understand the role of media better, for the next set of questions I am asking about the media reports from the past four months around ling yang, and your thoughts on how it may have affected your customer's choices.
15		Did you happen to hear about this media?
		Yes		16
		No		31
		Maybe		16
16		How did you hear about it? [Select all that apply]
		Social media		18
		News outlet/Newspaper		18
		Friends		18
		Family		18
		Colleague		18
		TCM association		18
		Other		17
		I don't know		18
17		Who else did you hear it from?
18		In your opinion, what was the media about?
19		In your opinion, has this media changed sales of ling yang to your female customers (aged about 35 - 59 years old)?
		No, sales have stayed the same		22
		Yes, sales have decreased		20
		Yes, sales have increased		21
		I don't know		23
20		About what percentage of sales do you think decreased?		22
21		About what percentage of sales do you think increased?
22		Why do you think that is?
23		In your opinion, has this media changed sales of ling yang among the rest of your customers?
		No, sales have stayed the same		26
		Yes, sales have decreased		24
		Yes, sales have increased		25
		I don't know		27
24		About what percentage of sales do you think decreased?		26
25		About what percentage of sales do you think increased?
26		Why do you think that is?
27		Do you think there has been a change in the sales of ALTERNATIVE products as a result of this media on ling yang?
		Yes		28
		No		29
		I don't know		29
28		How so?
29		Do you think this media has changed what products YOU recommend to customers to purchase?
		Yes		30
		No		31
		I don't know		31
30		How so?
		Demographics:
31		What is your gender?
		Male
		Female
		Prefer not to say
32		What is your age?
		18 - 35 years
		36 - 59 years
		≥ 60 years
		Prefer not to say
33		What generation of Singaporean are you?
		First
		Second
		Third
		More than third
		Prefer not to say
